# Supplementary material for: The Gastric Microbiome Is Perturbed in Advanced Gastric Adenocarcinoma Identified Through Shotgun Metagenomics
Source: Front Cell Infect Microbiol. 2018 Dec 12;8:433. doi: 10.3389/fcimb.2018.00433 (PMC6299874; doi:10.3389/fcimb.2018.00433)
Supplement: Supplementary file 1 [file Table_1.xlsx]

## Sheet: kneaddata_out
Supplementary Material of The gastric microbiome is perturbed in advanced gastric adenocarcinoma identified through shotgun metagenomics
Authors: Yuan-Liang Hu, Wei Pang, Yun Huang, Yan Zhang, Chao-Jun Zhang*; Correspondence: Chao-Jun Zhang: doctorzhangxq@aliyun.com
Supplementary table 1: Detailed clinical data of each enrolled patient.
Patients	Age(years)	Gender	Height(cm)	Weight(kg)	Type Ⅱ diabetes	Histological type of GC	Tumor stage	Lymph node metastasis	Distant metastasis
GC1	56	Male	165	58	No	Intestinal	T2	N0	M0
GC2	67	Female	170	90	No	Intestinal	T3	N0	M0
GC3	68	Male	166	68	Yes	Intestinal	T2	N0	M0
GC4	49	Male	170	64	No	mixed	T3	N2	M0
GC5	60	Male	176	80	No	Intestinal	T3	N0	M0
GC6	63	Male	168	63	No	Intestinal	T3	N1	M0
SG1	48	Male	1.67	76	No	-	-	-	-
SG2	58	Male	1.8	88	No	-	-	-	-
SG3	61	Female	1.72	74	No	-	-	-	-
SG4	49	Male	1.64	61	No	-	-	-	-
SG5	60	Male	1.76	80	Yes	-	-	-	-
