# Supplementary material for: The Gastric Microbiome Is Perturbed in Advanced Gastric Adenocarcinoma Identified Through Shotgun Metagenomics
Source: Front Cell Infect Microbiol. 2018 Dec 12;8:433. doi: 10.3389/fcimb.2018.00433 (PMC6299874; doi:10.3389/fcimb.2018.00433)
Supplement: Supplementary file 3 [file Table_3.xlsx]

## Sheet: TAXA
Supplementary Material of The gastric microbiome is perturbed in advanced gastric adenocarcinoma identified through shotgun metagenomics
Authors: Yuan-Liang Hu, Wei Pang, Yun Huang, Yan Zhang, Chao-Jun Zhang*; Correspondence: Chao-Jun Zhang: doctorzhangxq@aliyun.com
Supplementary table 3: The relative abundance of differentially abundant microbial taxa between clinical diagnoses(100%). GC, gastric adenocarcinoma; SG, superficial gastritis.
Taxa_ID	GC1	GC2	GC3	GC4	GC5	GC6	SG1	SG2	SG3	SG4	SG5	LDA score	p_value	q_value(FDR)
k__Bacteria.p__Proteobacteria.c__Alphaproteobacteria.o__Sphingomonadales.f__Sphingomonadaceae.g__Sphingobium.s__Sphingobium_yanoikuyae	0.17422	0.06537	0	1.92405	0	0	43.2212	1.5364	7.60449	4.73309	0.02192	4.666	0.0426802	0.0426802
k__Bacteria.p__Proteobacteria.c__Alphaproteobacteria.o__Sphingomonadales.f__Sphingomonadaceae.g__Sphingobium.s__Sphingobium_xenophagum	0	0	0	0.07053	0	0	0.30213	0.12077	0.70822	0.27527	0	3.24969	0.0220436	0.0413234
k__Bacteria.p__Firmicutes.c__Clostridia.o__Clostridiales.f__Clostridiales_Family_XIII_Incertae_Sedis.g__Clostridiales_Family_XIII_Incertae_Sedis_noname.s__Eubacterium_infirmum	0	0	0	0	0	0	0.01333	0.00649	0.02081	0.00894	0.00209	4.25768	0.00282232	0.0359076
k__Bacteria.p__Bacteroidetes.c__Bacteroidia.o__Bacteroidales.f__Prevotellaceae.g__Prevotella.s__Prevotella_denticola	0	0	0	0.0026	0	0	0.01115	0.50701	0.07508	0.05556	0	3.14824	0.0220436	0.0413234
k__Bacteria.p__Firmicutes.c__Clostridia.o__Clostridiales.f__Clostridiales_Family_XIII_Incertae_Sedis.g__Clostridiales_Family_XIII_Incertae_Sedis_noname	0	0	0	0	0	0	0.01333	0.00649	0.02081	0.00894	0.00209	4.25841	0.00282232	0.0359076
k__Bacteria.p__Proteobacteria.c__Alphaproteobacteria.o__Sphingomonadales.f__Sphingomonadaceae	0.17422	0.06537	0	2.06167	0	0	45.1539	10.7672	9.45177	5.25124	0.02192	4.78156	0.0270301	0.0413234
k__Bacteria.p__Actinobacteria.c__Actinobacteria.o__Coriobacteriales.f__Coriobacteriaceae.g__Atopobium.s__Atopobium_parvulum	0.10952	0	0	0	0	0	0.01661	0.05757	0.27307	0.103	0.01143	3.06325	0.0351749	0.0413234
k__Bacteria.p__Firmicutes.c__Bacilli.o__Lactobacillales.f__Streptococcaceae.g__Streptococcus.s__Streptococcus_parasanguinis	0.20307	0	0	0	0	0	0.02627	0.42136	0.22654	0.0209	0.14787	3.05541	0.0215717	0.0413234
k__Bacteria.p__Actinobacteria.c__Actinobacteria.o__Coriobacteriales.f__Coriobacteriaceae.g__Atopobium.s__Atopobium_parvulum.t__GCF_000024225	0.10952	0	0	0	0	0	0.01661	0.05757	0.27307	0.103	0.01143	3.0634	0.0351749	0.0413234
k__Bacteria.p__Actinobacteria.c__Actinobacteria.o__Actinomycetales.f__Micrococcaceae.g__Rothia.s__Rothia_mucilaginosa	0	0.09417	0.01229	0.05755	0	0	0.02927	0.27209	0.77543	0.1383	0.04258	3.71666	0.0426802	0.0426802
k__Bacteria.p__Firmicutes.c__Clostridia.o__Clostridiales.f__Lachnospiraceae.g__Lachnospiraceae_noname	0	0	0	0	0	0	0	0.01588	0.1427	0.04379	0.03144	3.2779	0.011164	0.0409346
k__Bacteria.p__Actinobacteria.c__Actinobacteria.o__Coriobacteriales.f__Coriobacteriaceae.g__Atopobium	0.10952	0	0	0	0	0	0.01661	0.05757	0.27307	0.103	0.01143	3.06125	0.0351749	0.0413234
k__Bacteria.p__Firmicutes.c__Clostridia.o__Clostridiales.f__Clostridiales_Family_XIII_Incertae_Sedis.g__Clostridiales_Family_XIII_Incertae_Sedis_noname.s__Eubacterium_infirmum.t__GCF_000242675	0	0	0	0	0	0	0.01333	0.00649	0.02081	0.00894	0.00209	4.25578	0.00282232	0.0359076
k__Bacteria.p__Firmicutes.c__Bacilli.o__Lactobacillales.f__Streptococcaceae.g__Streptococcus.s__Streptococcus_anginosus	0	0	0	0	0	0	0.01256	0.02314	0	0.0031	0	3.97491	0.0366275	0.0413234
k__Bacteria.p__Actinobacteria.c__Actinobacteria.o__Actinomycetales.f__Actinomycetaceae	0.02309	0	0.22083	0	0	0	0.05322	0.43273	0.82324	0.19264	0.09301	3.40389	0.0249325	0.0413234
k__Bacteria.p__Firmicutes.c__Clostridia.o__Clostridiales.f__Lachnospiraceae	0.03865	0	0	0	0	0	0.004	0.43017	0.23242	0.04379	0.07131	3.14949	0.00734473	0.0359076
k__Bacteria.p__Proteobacteria.c__Alphaproteobacteria.o__Sphingomonadales.f__Sphingomonadaceae.g__Sphingobium	0.17422	0.06537	0	1.99459	0	0	43.5233	1.65717	8.31271	5.00836	0.02192	4.67827	0.0426802	0.0426802
k__Bacteria.p__Firmicutes.c__Clostridia.o__Clostridiales.f__Lachnospiraceae.g__Oribacterium	0.03865	0	0	0	0	0	0.004	0.102	0.06101	0	0.03987	3.31654	0.0365712	0.0413234
k__Bacteria.p__Firmicutes.c__Clostridia.o__Clostridiales.f__Lachnospiraceae.g__Oribacterium.s__Oribacterium_sinus.t__GCF_000160635	0.03865	0	0	0	0	0	0.004	0.10046	0.06101	0	0.03987	3.31866	0.0365712	0.0413234
k__Bacteria.p__Firmicutes.c__Clostridia.o__Clostridiales.f__Lachnospiraceae.g__Oribacterium.s__Oribacterium_sinus	0.03865	0	0	0	0	0	0.004	0.10046	0.06101	0	0.03987	3.32535	0.0365712	0.0413234
k__Bacteria.p__Actinobacteria.c__Actinobacteria.o__Bifidobacteriales.f__Bifidobacteriaceae	0	0	0	0	0	0	0.00812	0.06601	0.06595	0	0	3.67655	0.0366275	0.0413234
k__Bacteria.p__Firmicutes.c__Clostridia.o__Clostridiales.f__Lachnospiraceae.g__Lachnospiraceae_noname.s__Lachnospiraceae_bacterium_ICM7.t__GCF_000287675	0	0	0	0	0	0	0	0	0.1427	0.04379	0.03144	3.17354	0.0366275	0.0413234
k__Bacteria.p__Actinobacteria.c__Actinobacteria.o__Actinomycetales.f__Actinomycetaceae.g__Actinomyces	0.02309	0	0.22083	0	0	0	0.05322	0.43273	0.82324	0.19264	0.09301	3.40538	0.0249325	0.0413234
k__Bacteria.p__Firmicutes.c__Bacilli.o__Lactobacillales.f__Streptococcaceae.g__Streptococcus.s__Streptococcus_cristatus	0	0	0	0	0	0	0.01389	0.04573	0	0.0359	0.02833	3.83089	0.011164	0.0409346
k__Bacteria.p__Firmicutes.c__Clostridia.o__Clostridiales.f__Lachnospiraceae.g__Lachnospiraceae_noname.s__Lachnospiraceae_bacterium_ICM7	0	0	0	0	0	0	0	0	0.1427	0.04379	0.03144	3.15005	0.0366275	0.0413234
k__Bacteria.p__Firmicutes.c__Bacilli.o__Lactobacillales.f__Streptococcaceae.g__Streptococcus.s__Streptococcus_sanguinis	0	0	0	0	0	0	0.00262	0.01265	0.06041	0	0	3.76098	0.0366275	0.0413234
k__Bacteria.p__Proteobacteria.c__Alphaproteobacteria.o__Sphingomonadales.f__Sphingomonadaceae.g__Blastomonas	0	0	0	0.06708	0	0	1.63066	9.11005	1.13906	0.24288	0	4.10352	0.0220436	0.0413234
k__Bacteria.p__Firmicutes.c__Bacilli.o__Lactobacillales.f__Streptococcaceae.g__Streptococcus.s__Streptococcus_australis	0	0	0	0.01604	0	0	0.01199	0.01817	1.42753	0.31646	0.03008	3.35173	0.00734473	0.0359076
k__Bacteria.p__Actinobacteria.c__Actinobacteria.o__Actinomycetales.f__Actinomycetaceae.g__Actinomyces.s__Actinomyces_graevenitzii	0.02309	0	0	0	0	0	0	0.42589	0.64499	0.13794	0.09301	3.25974	0.0220436	0.0413234
k__Bacteria.p__Actinobacteria.c__Actinobacteria.o__Coriobacteriales.f__Coriobacteriaceae	0.10952	0	0	0	0	0	0.01805	0.06931	0.27307	0.103	0.01143	3.06557	0.0351749	0.0413234
k__Bacteria.p__Proteobacteria.c__Gammaproteobacteria.o__Enterobacteriales.f__Enterobacteriaceae.g__Escherichia	0	0	0	0	0	0	0.01307	0.00472	1.29002	0.03949	0	3.39837	0.011164	0.0409346
k__Bacteria.p__Proteobacteria.c__Betaproteobacteria.o__Neisseriales.f__Neisseriaceae.g__Neisseria	13.3881	11.971	12.339	6.6497	22.2451	13.6025	0.76546	2.50042	6.34203	1.86881	0.71753	4.74828	0.0061699	0.0359076
k__Bacteria.p__Proteobacteria.c__Betaproteobacteria.o__Neisseriales.f__Neisseriaceae	13.3881	11.971	12.5472	6.6497	22.2451	13.7417	0.76546	2.50042	6.40503	1.86881	0.71753	4.75001	0.0061699	0.0359076
k__Bacteria.p__Proteobacteria.c__Gammaproteobacteria.o__Pasteurellales.f__Pasteurellaceae	11.4229	7.0221	5.69098	22.7156	2.32049	6.94058	0.57093	2.66858	4.48845	1.40234	0.34989	4.56502	0.0176221	0.0413234
k__Bacteria.p__Bacteroidetes.c__Bacteroidia.o__Bacteroidales.f__Porphyromonadaceae.g__Porphyromonas	14.9917	2.91459	14.1939	1.91043	29.5028	2.66732	0.48294	3.82837	1.3052	0.6987	0.55822	4.69462	0.0284597	0.0413234
k__Bacteria.p__Proteobacteria.c__Gammaproteobacteria.o__Pasteurellales.f__Pasteurellaceae.g__Aggregatibacter	1.63003	0.95744	0.66958	0.44968	1.11473	0.85317	0.00288	0.15387	0.43314	0.18167	0.10147	3.85038	0.0061699	0.0359076
k__Bacteria.p__Proteobacteria.c__Betaproteobacteria.o__Neisseriales.f__Neisseriaceae.g__Neisseria.s__Neisseria_sicca	2.10763	0.88938	0.19356	1.41082	1.51709	1.05746	0.06954	0.02113	0.95015	0.17779	0	3.79324	0.0176221	0.0413234
k__Bacteria.p__Bacteroidetes.c__Bacteroidia.o__Bacteroidales.f__Prevotellaceae.g__Alloprevotella	6.91598	27.9451	14.4855	4.559	14.3864	37.2996	1.13231	0.4914	3.00817	2.01819	1.17521	4.90876	0.0061699	0.0359076
k__Bacteria.p__Proteobacteria.c__Gammaproteobacteria.o__Pasteurellales.f__Pasteurellaceae.g__Aggregatibacter.s__Aggregatibacter_segnis.t__GCF_000185305	1.63003	0.50609	0.52164	0.44968	0	0.46194	0	0.01333	0.43314	0.18167	0	3.62502	0.0426802	0.0426802
k__Bacteria.p__Bacteroidetes.c__Bacteroidia.o__Bacteroidales.f__Porphyromonadaceae.g__Porphyromonas.s__Porphyromonas_endodontalis.t__GCF_000174815	11.0962	2.08844	4.47195	0.63574	29.5028	1.7936	0.19092	1.91601	0.82892	0.41576	0.18869	4.60107	0.0284597	0.0413234
k__Bacteria.p__Proteobacteria.c__Gammaproteobacteria.o__Pasteurellales.f__Pasteurellaceae.g__Aggregatibacter.s__Aggregatibacter_segnis	1.63003	0.50609	0.52164	0.44968	0	0.46194	0	0.01333	0.43314	0.18167	0	3.63516	0.0426802	0.0426802
k__Bacteria.p__Firmicutes.c__Bacilli.o__Lactobacillales.f__Streptococcaceae.g__Streptococcus.s__Streptococcus_mitis_oralis_pneumoniae	19.4132	1.71604	2.95771	4.45689	8.13584	2.8466	0.37105	0.26171	3.09273	1.36986	0.70741	4.48298	0.0284597	0.0413234
k__Bacteria.p__Bacteroidetes.c__Bacteroidia.o__Bacteroidales.f__Porphyromonadaceae	15.272	3.18473	15.0969	1.91043	29.5028	2.88346	0.48613	3.89295	1.3052	0.6987	0.62627	4.70477	0.0284597	0.0413234
k__Bacteria.p__Bacteroidetes.c__Bacteroidia.o__Bacteroidales.f__Porphyromonadaceae.g__Porphyromonas.s__Porphyromonas_endodontalis	11.0962	2.08844	4.47195	0.63574	29.5028	1.7936	0.19092	1.91601	0.82892	0.41576	0.18869	4.60107	0.0284597	0.0413234
