# Supplementary material for: The Gastric Microbiome Is Perturbed in Advanced Gastric Adenocarcinoma Identified Through Shotgun Metagenomics
Source: Front Cell Infect Microbiol. 2018 Dec 12;8:433. doi: 10.3389/fcimb.2018.00433 (PMC6299874; doi:10.3389/fcimb.2018.00433)
Supplement: Supplementary file 5 [file Table_5.xlsx]

## Sheet: Pathways_differ
Supplementary Material of The gastric microbiome is perturbed in advanced gastric adenocarcinoma identified through shotgun metagenomics
Authors: Yuan-Liang Hu, Wei Pang, Yun Huang, Yan Zhang, Chao-Jun Zhang*; Correspondence: Chao-Jun Zhang: doctorzhangxq@aliyun.com
Supplementary table 5: The relative abundance of differentially abundant pathways between clinical diagnoses. GC, gastric adenocarcinoma; SG, superficial gastritis.
Pathways_ID	GC1	GC2	GC3	GC4	GC5	GC6	SG1	SG2	SG3	SG4	SG5	LDA score	p_value	q_value(FDR)
PWY-5173: superpathway of acetyl-CoA biosynthesis	0.000664592	0	0.000959112	0.000452487	0	0	0.006767	0.00294242	0.00194724	0.000759219	0.0182734	3.45151	0.00989157	0.0374469
PWY-5971: palmitate biosynthesis II (bacteria and plants)	0.00391579	0	0	0	0	0	0.00212247	0.00593856	0.00505049	0.00291191	0.00275148	3.19833	0.0215717	0.0387052
ILEUDEG-PWY: L-isoleucine degradation I	0	0	0	0.000347815	0	0	0.00777805	0.000474552	0.0012815	0.00100809	0	3.01053	0.0220436	0.0387052
BRANCHED-CHAIN-AA-SYN-PWY: superpathway of branched amino acid biosynthesis	0.00708523	0.0052374	0.00643955	0.00481568	0.00666996	0.00577153	0.00890529	0.00734277	0.00766122	0.00616673	0.00905565	2.95704	0.0284597	0.0387052
PWY-5103: L-isoleucine biosynthesis III	0.00657474	0.00612463	0.00609429	0.00353176	0.00603876	0.00505806	0.00825773	0.00727331	0.00754115	0.00545933	0.00785956	2.93588	0.0446097	0.0489268
PWY-5676: acetyl-CoA fermentation to butanoate II	0.000105089	0	0.000263566	0.000509325	0	0	0.00419962	0.000769801	0.00236281	0.000909533	8.11e-05	2.88318	0.0270301	0.0387052
"GLYCOLYSIS-TCA-GLYOX-BYPASS: superpathway of glycolysis, pyruvate dehydrogenase, TCA, and glyoxylate bypass"	0.000609451	0.000306497	0.000268998	0	0	0	0.00199081	0.00178178	0.00207829	0.000809904	0	2.77288	0.049746	0.049746
PWY-6285: superpathway of fatty acids biosynthesis (E. coli)	0.000861507	0	0	0	0	0	0.000751909	0.00115192	0.00329601	0.00105214	0.000423756	2.7721	0.0127991	0.0374469
"PRPP-PWY: superpathway of histidine, purine, and pyrimidine biosynthesis"=Pyrimidine, purine, and pyridine nucleotide synthesis all require phosphoribosylpyrophosphate (PRPP) as a precursor.	0	0	0	0	0	0	0.000292889	0.000621059	0.0034248	0	0.000657675	2.68452	0.011164	0.0374469
TCA-GLYOX-BYPASS: superpathway of glyoxylate bypass and TCA	0.000326832	0.000156705	0.000138148	0	0	0	0.0011973	0.00169478	0.00130468	0.000426484	0	2.64196	0.049746	0.049746
PWY66-399: gluconeogenesis III	0.00100958	0.000325789	0.000767362	6.3e-05	0	0.000327041	0.00118039	0.00120082	0.00215967	0.00074712	0.000433026	2.58714	0.0446097	0.0489268
PWY-6284: superpathway of unsaturated fatty acids biosynthesis (E. coli)	0.000459855	0	0	0	0	0	0.00043233	0.000608468	0.00231403	0.000607416	0.000218058	2.58136	0.0127991	0.0374469
GLYOXYLATE-BYPASS: glyoxylate cycle	0.000155094	7.07e-05	6.35e-05	0	0	0	0.000559422	0.00152206	0.000724312	0.000195262	0	2.48528	0.049746	0.049746
PWY-7196: superpathway of pyrimidine ribonucleosides salvage	0	0	0	0	0	0	0.000119153	0.000241901	0.00211698	0	0.000367076	2.44846	0.011164	0.0374469
PWY-5910: superpathway of geranylgeranyldiphosphate biosynthesis I (via mevalonate)	0	0	0	0.000170961	0	0	2.79e-05	0.000284514	0.000453381	0.00045362	0.000114054	2.18792	0.0127991	0.0374469
P162-PWY: L-glutamate degradation V (via hydroxyglutarate)	0	0	0	6.19e-05	0	0	5.91e-05	0.000514957	0.000375506	7.53e-05	0	2.08481	0.0365712	0.0478239
PWY-5022: 4-aminobutanoate degradation V	0	0	0	0	0	0	4.92e-05	4.34e-05	0.00015043	2.08e-05	0	2.07701	0.011164	0.0387052
FAO-PWY: fatty acid &beta;-oxidation I	0	0	0	6.01e-05	0	0	0.000273245	0.0002925	0.000214238	9.31e-05	0	2.08268	0.0220436	0.0374469
DTDPRHAMSYN-PWY: dTDP-L-rhamnose biosynthesis I	0.00615129	0.00969571	0.0107631	0.0032702	0.01173	0.00933489	0.00147432	0.00844826	0.00459672	0.00226888	0.000719428	3.38278	0.0284597	0.0387052
PWY-5695: urate biosynthesis/inosine 5'-phosphate degradation	0.0114102	0.0105703	0.0132108	0.00944792	0.017547	0.012351	0.00791475	0.0109134	0.00925116	0.010517	0.0028968	3.30579	0.0284597	0.0387052
NAGLIPASYN-PWY: lipid IVA biosynthesis	0.00418959	0.00461174	0.00457205	0.00660864	0.00464202	0.00614476	0.000822808	0.00295354	0.00264881	0.00141174	0.000237824	3.24578	0.0061699	0.0374469
OANTIGEN-PWY: O-antigen building blocks biosynthesis (E. coli)	0.00452251	0.00561296	0.00507387	0.00399433	0.00930719	0.00582379	0.00224596	0.00267159	0.0045285	0.00334855	0.000469052	3.19912	0.0176221	0.0374469
PWY-6519: 8-amino-7-oxononanoate biosynthesis I	0.00498975	0.00201529	0.00440022	0.0040865	0.00548669	0.00413243	0.000761973	0.00259454	0.00236433	0.00127058	0.000381928	3.13534	0.0176221	0.0374469
BIOTIN-BIOSYNTHESIS-PWY: biotin biosynthesis I	0.00493324	0.00232735	0.00447162	0.00461533	0.0054287	0.0043477	0.000947286	0.00273174	0.00260085	0.00155657	0.000367623	3.13484	0.0176221	0.0374469
PWY-4242: pantothenate and coenzyme A biosynthesis III	0.0052801	0.00726056	0.00737143	0.00505855	0.00707131	0.00933526	0.00208459	0.00660249	0.00661714	0.00314026	0.00367697	3.10005	0.0446097	0.0489268
PENTOSE-P-PWY: pentose phosphate pathway	0.00427398	0.00381221	0.00447739	0.00534247	0.00355569	0.00381851	0.000989415	0.00194025	0.00275251	0.00352239	0.000921725	3.03464	0.0061699	0.0374469
PWY-1269: CMP-3-deoxy-D-manno-octulosonate biosynthesis I	0.00266999	0.00254058	0.00217294	0.00500955	0.00411341	0.00326187	0.00066457	0.00250168	0.00198945	0.00103478	0.000158289	3.01196	0.0105871	0.0374469
PWY-7187: pyrimidine deoxyribonucleotides de novo biosynthesis II	0.00628672	0.00715757	0.00646348	0.00627514	0.00445511	0.00706133	0.00301883	0.00525091	0.00596515	0.00387683	0.00313226	3.00989	0.0176221	0.0374469
ARGSYNBSUB-PWY: L-arginine biosynthesis II (acetyl cycle)	0.00340488	0.00254633	0.00355181	0.00328413	0.00393381	0.00246166	0.000778327	0.00185672	0.00256877	0.000603288	0.00036921	2.98768	0.0176221	0.0374469
PWY0-1261: anhydromuropeptides recycling	0.0041685	0.00398077	0.00457647	0.00577354	0.00363418	0.0045119	0.0024536	0.0029783	0.00434899	0.00226118	0.000436828	2.98306	0.0284597	0.0387052
ARGSYN-PWY: L-arginine biosynthesis I (via L-ornithine)	0.00345377	0.00268667	0.00373711	0.00352673	0.0038525	0.00234657	0.00159894	0.00255201	0.0034819	0.0015097	0.000963825	2.78266	0.0446097	0.0489268
PWY0-1415: superpathway of heme biosynthesis from uroporphyrinogen-III	0.0024977	0.00346293	0.00347477	0.00370708	0.00176618	0.00378461	0.00170599	0.00310278	0.00259792	0.00154265	0.000646302	2.76843	0.0446097	0.0489268
GLUTORN-PWY: L-ornithine biosynthesis	0.00214364	0.00165556	0.00234585	0.00208017	0.00153757	0.00178448	0.000440144	0.00125798	0.00154545	0.000597861	0.000209325	2.75438	0.0105871	0.0374469
FUCCAT-PWY: fucose degradation	0.000994483	0.000756649	8.12e-05	0.00328758	0.000436208	0.000297201	9.66e-05	0.000105358	0.000281452	3.72e-05	0	2.67848	0.0284597	0.0387052
